# Supplementary material for: High Temperature Alters Secondary Metabolites and Photosynthetic Efficiency in Heracleum sosnowskyi
Source: MDPI journal article supplement (doi:10.3390/ijms22094756), 2021-04-30
Supplement: s1 [file s1]

SUPPLEMENTARY MATERIALS

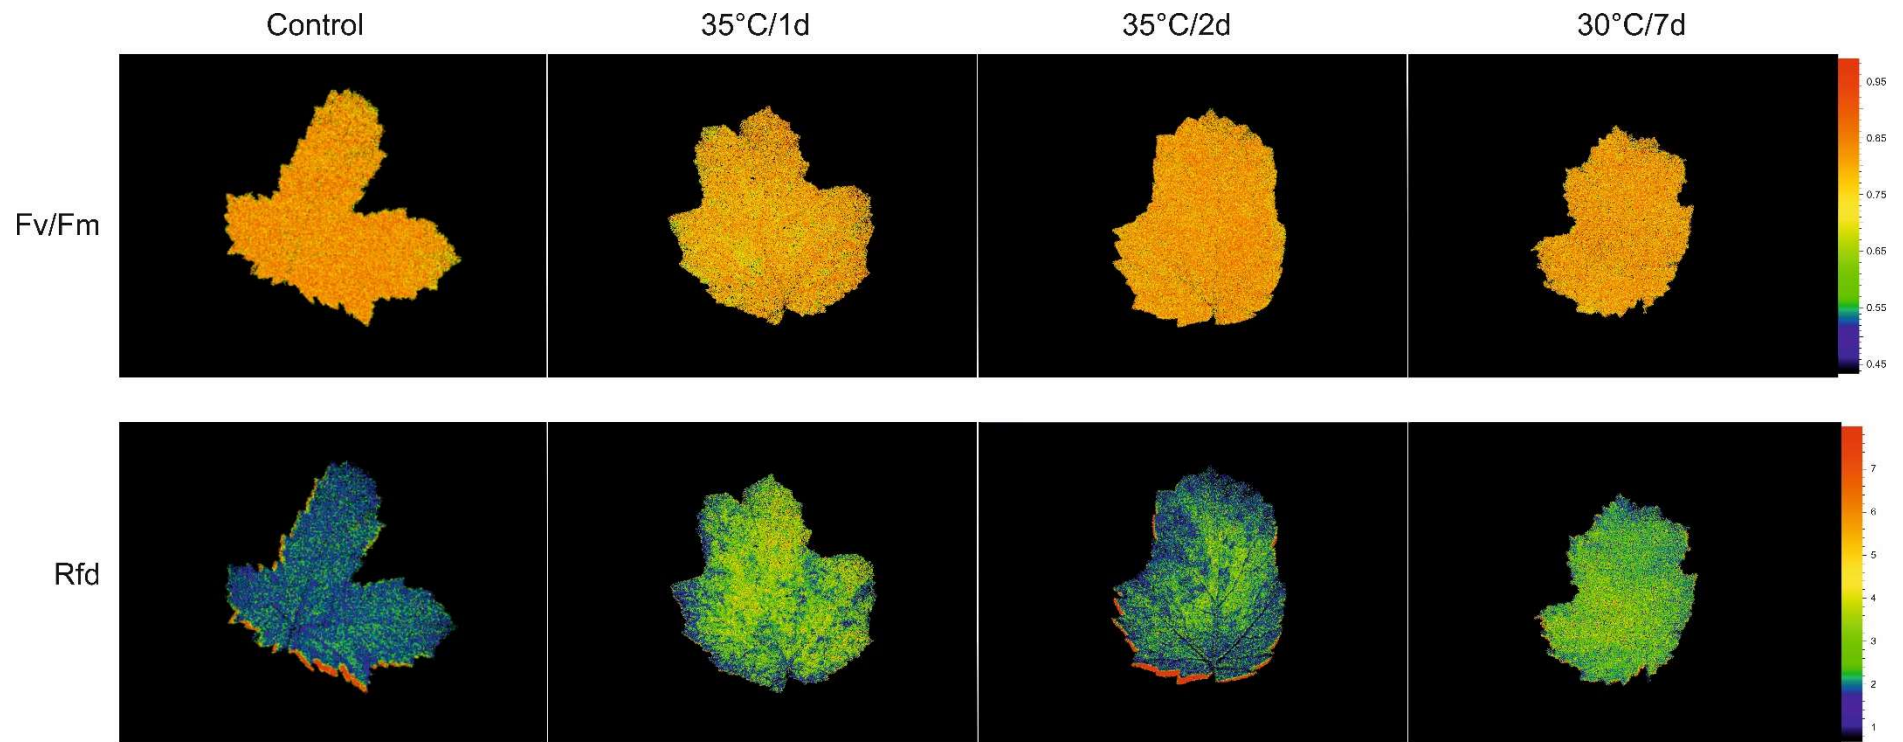

**Suppl. Fig. 1.** Chlorophyll *a* fluorescence parameters (Fv/Fm; Rfd) determined with an imaging PAM equipment

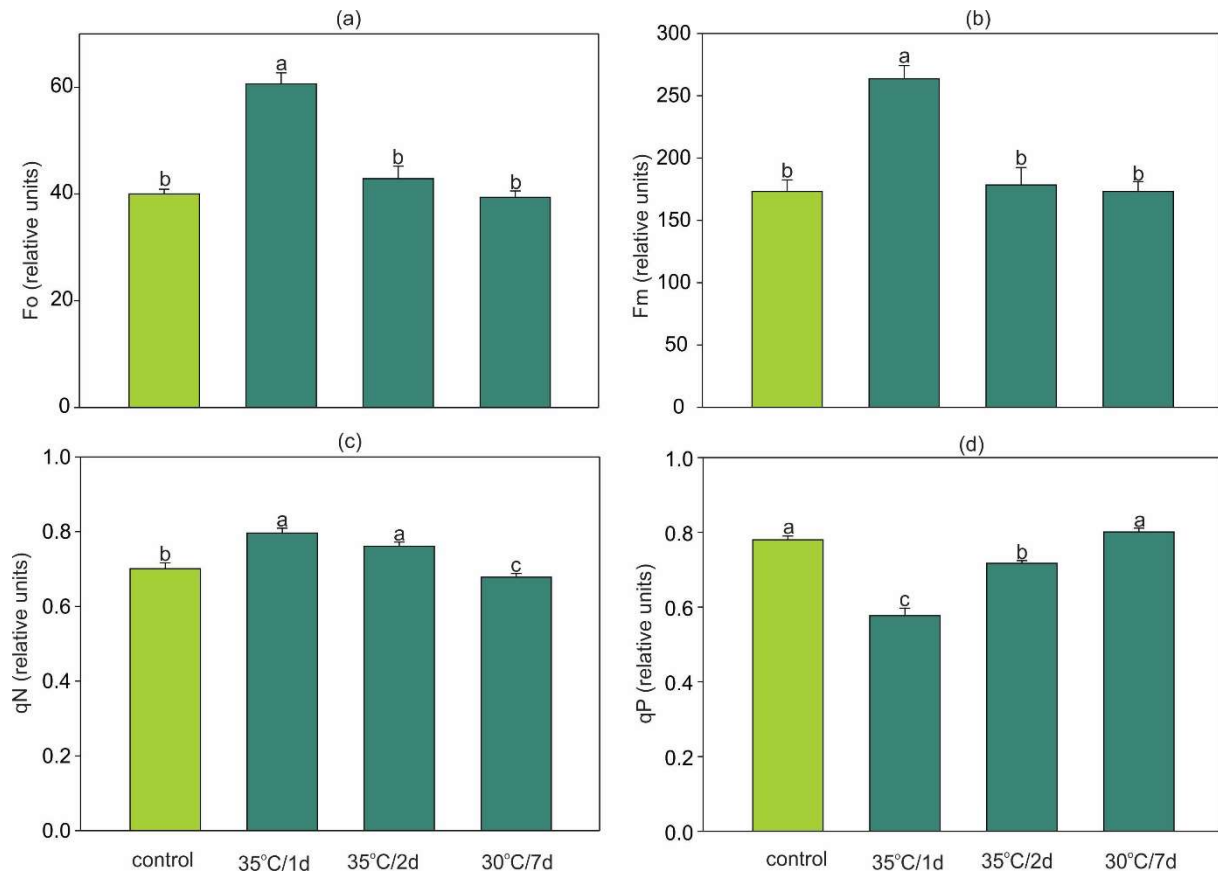

**Suppl. Fig. 2.** Minimal (a) and maximal (b) fluorescence in dark-adapted leaves, and the non-photochemical (c) and photochemical quenching (d) in the leaves of *H. sosnovskyi* in response to stress temperature. Data are means  $\pm$  SE (n=4). Values followed by the same letter(s) are not significantly different according to Tukey's test ( $p < 0.05$ ).

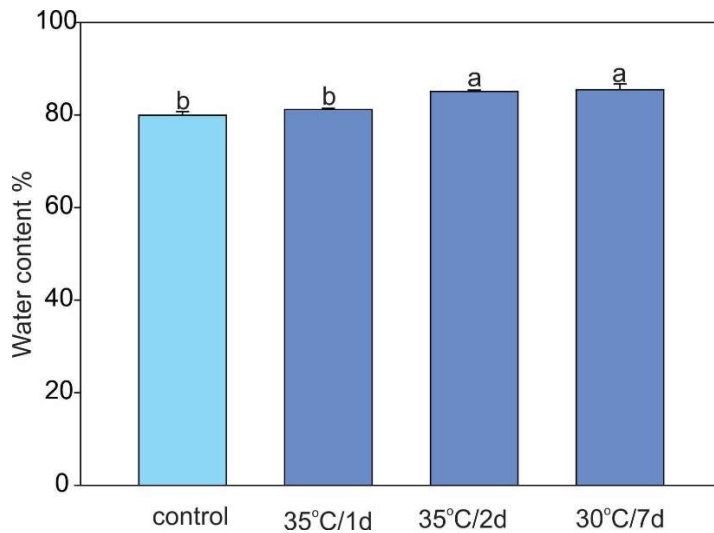

**Suppl. Fig. 3.** Water content in *H. sosnovskyi* leaves in response to stress temperature. Data are means  $\pm$  SE (n=4). Values followed by the same letter(s) are not significantly different according to Tukey's test ( $p < 0.05$ ).

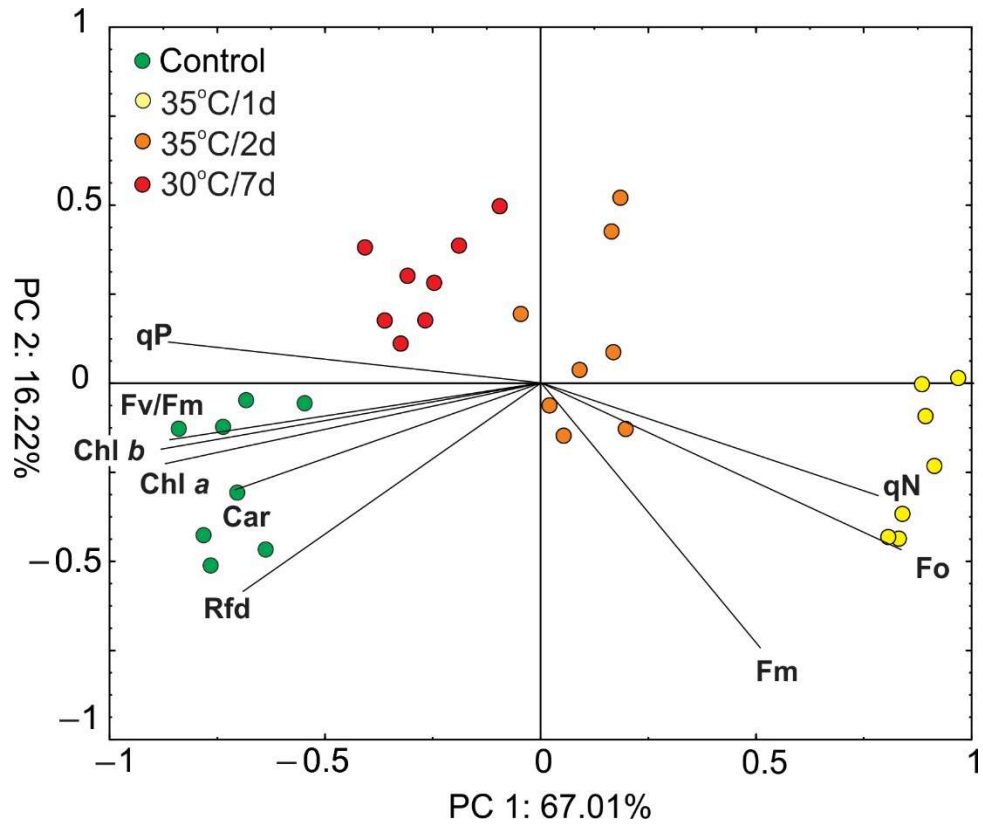

**Suppl. Fig. 4.** Scaled scatter plot of the principal component analysis of photosynthetic pigments (Chl *a*, Chl *b*, Car) and parameters of chlorophyll *a* fluorescence (Fv/Fm, Rfd, F<sub>0</sub>, Fm, qN and qP). The length of lines shows a correlation between original data and the factor axes.
